# Supplementary material for: Whole-genome analysis of a Vibrio cholerae O1 biotype classical strain isolated in 1946 in Sasebo city, Nagasaki prefecture, from a returnee from the northeast part of China
Source: PubMed Central journal article supplement (PMC9893581; doi:10.1186/s41182-023-00500-4), 2023-02-02
Supplement: 41182_2023_500_MOESM2_ESM.pdf [file 41182_2023_500_MOESM2_ESM.pdf]

Table S 1

| Strain name | Serogroup, Biotype  | Accession Numbers      | year    | Country    | Region        | Source   |
|-------------|---------------------|------------------------|---------|------------|---------------|----------|
| 1587        | O12, Not applicable | SRX008805              | 1994    | Peru       | South_America | Clinical |
| A152        | O1, El Tor          | ERR018152              | 1991    | Mozambique | Africa        | Clinical |
| N16961      | O1, El Tor          | PRJNA606590            | 1975    | Bangladesh | Asia          | Clinical |
| MO10        | O1, El Tor          | PRJNA261682            | 1992    | India      | Asia          | Clinical |
| VC150       | O1, El Tor          | SAMEA2006877           | 1992    | Nepal      | Asia          | Clinical |
| V5          | O1, El Tor          | ERR018127              | 1989    | India      | Asia          | Clinical |
| MJ_1236     | O1, El Tor          | PRJNA33555             | 1994    | Bangladesh | Asia          | Clinical |
| 6196        | O1, El Tor          | ERR019293              | 2005    | Kenya      | Africa        | Clinical |
| 7686        | O1, El Tor          | ERR028075              | 2009    | Kenya      | Africa        | Clinical |
| PRL64       | O1, El Tor          | ERR018195              | 1992    | India      | Asia          | Clinical |
| 4662        | O1, El Tor          | ERR025373              | 2001    | Bangladesh | Asia          | Clinical |
| HFU_02      | O1, El Tor          | CP043554.1, CP043556.1 | 2010    | Haiti      | Calibbean     | Clinical |
| A46         | O1, classical       | ERR018132              | 1964    | unknown    | unknown       | Clinical |
| A51         | O1, classical       | ERR018141              | 1949    | Egypt      | Africa        | Clinical |
| A59         | O1, classical       | ERR018139              | 1970    | India      | Asia          | Clinical |
| A68         | O1, classical       | ERR018135              | 1949    | Egypt      | Africa        | Clinical |
| RC27        | O1, classical       | PRJNA40505             | 1991    | Indonesia  | Asia          | Clinical |
| A111        | O1, classical       | ERR018155              | 1990    | unknown    | unknown       | Clinical |
| Man9        | O1, classical       | This study             | 1946    | Japan      | Asia          | Clinical |
| A50         | O1, classical       | ERR018142              | 1953    | Bangladesh | Asia          | Clinical |
| A49         | O1, classical       | ERR018134              | 1952    | unknown    | unknown       | Clinical |
| A61         | O1, classical       | ERR018137              | 1970    | India      | Asia          | Clinical |
| A57         | O1, classical       | ERR018140              | 1980    | India      | Asia          | Clinical |
| A60         | O1, classical       | ERR018138              | 1958    | Thailand   | Asia          | Clinical |
| O395        | O1, classical       | PRJNA293904            | 1965    | India      | Asia          | Clinical |
| A66         | O1, classical       | ERR018136              | 1962    | Bangladesh | Asia          | Clinical |
| A103        | O1, classical       | ERR018145              | 1990    | unknown    | unknown       | Clinical |
| A76         | O1, classical       | ERR018143              | 1982    | Bangladesh | Asia          | Clinical |
| A389        | O1, classical       | ERR018178              | 1987    | Bangladesh | Asia          | Clinical |
| A279        | O1, classical       | ERR018173              | 1990    | Sweden     | Europe        | Clinical |
| GP8         | O1, classical       | ERR018129              | 1970    | India      | Asia          | Clinical |
| A70         | O1, classical       | ERR018133              | 1969    | Bangladesh | Asia          | Clinical |
| GP16        | O1, classical       | ERR018184              | 1971    | India      | Asia          | Clinical |
| VC201       | O1, classical       | ERR125427-ERR125431    | 1985    | Pakistan   | Asia          | Clinical |
| VC200       | O1, classical       | ERR125425-ERR125426    | 1985    | Pakistan   | Asia          | Clinical |
| VC214       | O1, classical       | ERR125441-ERR125445    | unknown | Pakistan   | Asia          | Clinical |

| Strain name | Accession           | scaffold                  | year       | Country    | Region        | Source     |
|-------------|---------------------|---------------------------|------------|------------|---------------|------------|
| V52         | PRJNA224116         | V52.fasta                 | 1968       | Sudan      | Africa        | Clinical   |
| A46         | ERR018132           | scaf_.fasta               | 1964       | unknown    | unknown       | Clinical   |
| A51         | ERR018141           | scaf_A51ERR018141.fasta   | 1949       | Egypt      | Africa        | Clinical   |
| RC27        | PRJNA40505          | RC27.fasta                | 1991       | Indonesia  | Asia          | Clinical   |
| A111        | ERR018155           | scaf_.fasta               | 1990       | unknown    | unknown       | Clinical   |
| Man9        | This study          | This study                | This study | This study | This study    | This study |
| GP8         | ERR018129           | scaf_.fasta               | 1970       | India      | Asia          | Clinical   |
| A70         | ERR018133           | scaf_ERR018133.fasta      | 1969       | Bangladesh | Asia          | Clinical   |
| VC200       | ERR125425-ERR125426 | scaf_SAMEA2007293.fasta   | 1986       | Pakistan   | Asia          | Clinical   |
| VC214       | ERR125441-ERR125445 | scaf_SAMEA1972393.fasta   | unknown    | Pakistan   | Asia          | Clinical   |
| VC201       | ERR125427-ERR125431 | scaf_SAMEA2007294.fasta   | 1986       | Pakistan   | Asia          | Clinical   |
| GP16        | ERR018184           | scaf_ERR018184.fasta      | 1971       | India      | Asia          | Clinical   |
| A389        | ERR018178           | scaf_ERR018178.fasta      | 1987       | Bangladesh | Asia          | Clinical   |
| A103        | ERR018145           | scaf_ERR018145.fasta      | 1990       | unknown    | unknown       | Clinical   |
| A66         | ERR018136           | scaf_ERR018136.fasta      | 1962       | Bangladesh | Asia          | Clinical   |
| A76         | ERR018143           | scaf_ERR018143.fasta      | 1982       | Bangladesh | Asia          | Clinical   |
| A279        | ERR018173           | scaf_A279ERR018173.fasta  | 1990       | Sweden     | Europe        | Clinical   |
| O395        | PRJNA293904         | O395.fasta                | 1965       | India      | Asia          | Clinical   |
| A60         | ERR018138           | scaf_A60ERR018138.fasta   | 1958       | Thailand   | Asia          | Clinical   |
| A57         | ERR018140           | scaf_ERR018140.fasta      | 1980       | India      | Asia          | Clinical   |
| A61         | ERR018137           | scaf_ERR018137.fasta      | 1970       | India      | Asia          | Clinical   |
| A49         | ERR018134           | scaf_ERR018134.fasta      | 1962       | unknown    | unknown       | Clinical   |
| A50         | ERR018142           | scaf_ERR018142.fasta      | 1963       | Bangladesh | Asia          | Clinical   |
| A59         | ERR018139           | scaf_ERR018139.fasta      | 1970       | India      | Asia          | Clinical   |
| A68         | ERR018135           | scaf_ERR018135.fasta      | 1949       | Egypt      | Africa        | Clinical   |
| 7686        | ERR028075           | scaf_ERR028075.fasta      | 2009       | Kenya      | Africa        | Clinical   |
| 6196        | ERR019293           | scaf_ERR019293.fasta      | 2005       | Kenya      | Africa        | Clinical   |
| PRL64       | ERR018195           | scaf_PRL64ERR018195.fasta | 1992       | India      | Asia          | Clinical   |
| 4662        | ERR025373           | scaf_ERR025373.fasta      | 2001       | Bangladesh | Asia          | Clinical   |
| V5          | ERR018127           | scaf_V5ERR018127.fasta    | 1989       | India      | Asia          | Clinical   |
| MO10        | PRJNA261682         | MO10.fasta                | 1992       | India      | Asia          | Clinical   |
| MJ_1236     | PRJNA33555          | MJ-1236.fasta             | 1994       | Bangladesh | Asia          | Clinical   |
| A152        | ERR018152           | scaf_ERR018152.fasta      | 1991       | Mozambique | Africa        | Clinical   |
| A201        | ERR018167           | scaf_A201ERR018167.fasta  | 1992       | Argentina  | South_America | Clinical   |
| N16961      | PRJNA606590         | N16961.fasta              | 1975       | Bangladesh | Asia          | Clinical   |
| MAK757      | SRX002426           | MAK-757.fasta             | 1937       | Indonesia  | Asia          | Clinical   |
| MZO_3       | PRJNA18261          | MZO-3.fasta               | 2001       | Bangladesh | Asia          | Clinical   |
| 1587        | SRX008805           | 1587.fasta                | 1994       | Peru       | South_America | Clinical   |

Supplemental Table 2

| Strain name | Data access            | scaffold                  | year       | Country    | Region        | Source     |
|-------------|------------------------|---------------------------|------------|------------|---------------|------------|
| V52         | PRJNA224116            | V52.fasta                 | 1968       | Sudan      | Africa        | Clinical   |
| A46         | ERR018132              | scaf_.fasta               | 1964       | unknown    | unknown       | Clinical   |
| A51         | ERR018141              | scaf_A51ERR018141.fasta   | 1949       | Egypt      | Africa        | Clinical   |
| RC27        | PRJNA40505             | RC27.fasta                | 1991       | Indonesia  | Asia          | Clinical   |
| A111        | ERR018155              | scaf_.fasta               | 1990       | unknown    | unknown       | Clinical   |
| Man9        | This study             | This study                | This study | This study | This study    | This study |
| GP8         | ERR018129              | scaf_.fasta               | 1970       | India      | Asia          | Clinical   |
| A70         | ERR018133              | scaf_ERR018133.fasta      | 1969       | Bangladesh | Asia          | Clinical   |
| VC200       | ERR125425-ERR125426    | scaf_SAMEA2007293.fasta   | 1986       | Pakistan   | Asia          | Clinical   |
| VC214       | ERR125441-ERR125445    | scaf_SAMEA1972393.fasta   | unknown    | Pakistan   | Asia          | Clinical   |
| VC201       | ERR125427-ERR125431    | scaf_SAMEA2007294.fasta   | 1986       | Pakistan   | Asia          | Clinical   |
| GP16        | ERR018184              | scaf_ERR018184.fasta      | 1971       | India      | Asia          | Clinical   |
| A389        | ERR018178              | scaf_ERR018178.fasta      | 1987       | Bangladesh | Asia          | Clinical   |
| A103        | ERR018145              | scaf_ERR018145.fasta      | 1990       | unknown    | unknown       | Clinical   |
| A66         | ERR018136              | scaf_ERR018136.fasta      | 1962       | Bangladesh | Asia          | Clinical   |
| A76         | ERR018143              | scaf_ERR018143.fasta      | 1982       | Bangladesh | Asia          | Clinical   |
| A279        | ERR018173              | scaf_A279ERR018173.fasta  | 1990       | Sweden     | Europe        | Clinical   |
| O395        | PRJNA293904            | O395.fasta                | 1965       | India      | Asia          | Clinical   |
| A60         | ERR018138              | scaf_A60ERR018138.fasta   | 1958       | Thailand   | Asia          | Clinical   |
| A57         | ERR018140              | scaf_ERR018140.fasta      | 1980       | India      | Asia          | Clinical   |
| A61         | ERR018137              | scaf_ERR018137.fasta      | 1970       | India      | Asia          | Clinical   |
| A49         | ERR018134              | scaf_ERR018134.fasta      | 1962       | unknown    | unknown       | Clinical   |
| A50         | ERR018142              | scaf_ERR018142.fasta      | 1963       | Bangladesh | Asia          | Clinical   |
| A59         | ERR018139              | scaf_ERR018139.fasta      | 1970       | India      | Asia          | Clinical   |
| A68         | ERR018135              | scaf_ERR018135.fasta      | 1949       | Egypt      | Africa        | Clinical   |
| 7686        | ERR028075              | scaf_ERR028075.fasta      | 2009       | Kenya      | Africa        | Clinical   |
| 6196        | ERR019293              | scaf_ERR019293.fasta      | 2005       | Kenya      | Africa        | Clinical   |
| PRL64       | ERR018195              | scaf_PRL64ERR018195.fasta | 1992       | India      | Asia          | Clinical   |
| 4662        | ERR025373              | scaf_ERR025373.fasta      | 2001       | Bangladesh | Asia          | Clinical   |
| V5          | ERR018127              | scaf_V5ERR018127.fasta    | 1989       | India      | Asia          | Clinical   |
| MO10        | PRJNA261682            | MO10.fasta                | 1992       | India      | Asia          | Clinical   |
| MJ_1236     | PRJNA33555             | MJ-1236.fasta             | 1994       | Bangladesh | Asia          | Clinical   |
| A152        | ERR018152              | scaf_ERR018152.fasta      | 1991       | Mozambique | Africa        | Clinical   |
| N16961      | PRJNA606590            | N16961.fasta              | 1975       | Bangladesh | Asia          | Clinical   |
| VC150       | SAMEA2006877           |                           | 1992       | Nepal      | Asia          | Clinical   |
| HFU-02      | CP043554.1, CP043556.1 |                           | 1992       | Haiti      | Calibbean     | Clinical   |
| MAK757      | SRX002426              | MAK-757.fasta             | 1937       | Indonesia  | Asia          | Clinical   |
| MZO_3       | PRJNA18261             | MZO-3.fasta               | 2001       | Bangladesh | Asia          | Clinical   |
| 1587        | SRX008805              | 1587.fasta                | 1994       | Peru       | South_America | Clinical   |
