# Supplementary material for: Whole-genome analysis of a Vibrio cholerae O1 biotype classical strain isolated in 1946 in Sasebo city, Nagasaki prefecture, from a returnee from the northeast part of China
Source: PubMed Central journal article supplement (PMC9893581; doi:10.1186/s41182-023-00500-4), 2023-02-02
Supplement: 41182_2023_500_MOESM3_ESM.pdf [file 41182_2023_500_MOESM3_ESM.pdf]

Table S2

| Strain | Size of fragments, kb  |            | PCR profile     |                 |                    |                   |                 |                 |                       |                     |               |                |                |                   |                  |                |
|--------|------------------------|------------|-----------------|-----------------|--------------------|-------------------|-----------------|-----------------|-----------------------|---------------------|---------------|----------------|----------------|-------------------|------------------|----------------|
|        | <i>Bgl</i> I digestion |            | TLC3F/<br>rstAR | TLC3F/<br>rstC2 | TLC3F/<br>rstRclAR | TLC3F/<br>rstRETR | ctxAF/<br>rtx5R | ctxBF/<br>ctxBR | rstRclAF/<br>rstRclAR | rstRETF/<br>rstRETR | CIIF/<br>CIIR | CIIF/<br>rstAR | CIIF/<br>rstC2 | CIIF/<br>rstRclAR | CIIF/<br>rstRETR | ctxAF/<br>CIIR |
|        | zot probe              | ctxA probe |                 |                 |                    |                   |                 |                 |                       |                     |               |                |                |                   |                  |                |
| Man9   | 13; 11.2; 5.8; 3.5     | 11.2; 3.5  | P               | N               | P                  | N                 | P               | P               | P                     | N                   | N             | P              | N              | P                 | N                | P              |
| O395   | 11.2; 7.6; 3.5         | 11.2; 3.5  | P               | N               | P                  | N                 | P               | P               | P                     | N                   | N             | P              | N              | P                 | N                | P              |
